# Supplementary material for: Design and Simulation of a Ratiometric SPR Sensor Based on a 2D van der Waals Heterojunction for Refractive Index Measurement
Source: MDPI journal article supplement (doi:10.3390/nano13030515), 2023-01-27
Supplement: s1 [file s1]

# Design and Simulation of a Ratiometric SPR Sensor Based on a 2D van der Waals Heterojunction for Refractive Index Measurement

Jun Zhou <sup>1</sup>, Xiantong Yu <sup>1,\*</sup>, Lianzhen Zhang <sup>1</sup>, Xuejing Liu <sup>1</sup>, Youjun Zeng <sup>2</sup> and Xuedian Zhang <sup>1,\*</sup>

<sup>1</sup> Key Laboratory of Optical Technology and Instrument for Medicine, Ministry of Education, University of Shanghai for Science and Technology, Shanghai 200093, China

<sup>2</sup> School of Physics & Optoelectronic Engineering, Guangdong University of Technology, Guangzhou 510006, China

\* Correspondence: xtyu@usst.edu.cn (X.Y.); xdzhang@usst.edu.cn (X.Z.)

## Part A: Transfer matrix method (TMM) for reflection of multilayer films:

In this work, the reflection of multilayer films is measured by using the transfer matrix method (TMM) and Fresnel equation of multilayer film [1–3]. All layers in the system are considered to be optically isotropic and nonmagnetic.

Reflection coefficient,  $r_p$ , can be described by Fresnel equation and Snell's law:

$$r_p = \frac{E_{rp}}{E_{ip}} = \frac{n_t \cos \theta_i - n_i \cos \theta_t}{n_t \cos \theta_i + n_i \cos \theta_t} \quad (S1)$$

$$n_i \sin \theta_i = n_t \sin \theta_t \quad (S2)$$

$n_i$  and  $n_t$  are the refractive indexes of the two media at the interface respectively.

For multi-layer case, the transfer matrix method is used for calculation. The matrix can be described as follows:

$$M = \prod_{k=2}^{N-1} M_k = \begin{bmatrix} M_{11} & M_{12} \\ M_{21} & M_{22} \end{bmatrix} \quad (S3)$$

$$M_k = \begin{bmatrix} \cos \beta_k & -i \frac{\sin \theta_k}{q_k} \\ -iq_k \sin \beta_k & \cos \beta_k \end{bmatrix} \quad (S4)$$

$$q_k = \frac{(\varepsilon_k - n_{SF11}^2 \sin^2 \theta_1)^{1/2}}{\varepsilon_k} \quad (S5)$$

$$\beta_k = \frac{2\pi n_k \cos \theta_k (Z_k - Z_{k-1})}{\lambda} = \frac{\pi d_k}{2} (\varepsilon_k - n_1^2 \sin^2 \theta_1)^{1/2} \quad (S6)$$

$n_k$  is Refractive index of the  $k$ -th layer,  $\theta_1$  is the angle of incidence of the first layer,  $\varepsilon_k$  and  $d_k$  are respectively the dielectric function and thickness of the  $k$ -th layer.

The first boundary of the tangential field is defined as  $Z_1=0$ , last boundary  $Z_n=1$ :

$$\begin{bmatrix} U_1 \\ V_1 \end{bmatrix} = M \begin{bmatrix} U_{N-1} \\ V_{N-1} \end{bmatrix} \quad (S7)$$

where  $U$  is the tangential component of the interface electric field and  $V$  is the tangential component of the magnetic field. Therefore, for the  $n$ -th layer  $p$ -polarized light, the reflection coefficient is,

$$r_p = \frac{(M_{11} + M_{12}q_N)q_1 - (M_{21} + M_{22}q_N)}{(M_{11} + M_{12}q_N)q_1 + (M_{21} + M_{22}q_N)} \quad (S8)$$

And the reflection coefficient of SPR,  $R_p$ ,

$$R_p = |r_p|^2 \quad (S9)$$

Equation (S8), (S9) is also applies to s-polarized light, and the parameters,

$$q_k = (\varepsilon_k - n_{SF11}^2 \sin^2 \theta_1)^{1/2} \quad (S10)$$

## Part B: Refractive Index calculation of MoS<sub>2</sub>

According to the experimental data [4], the complex refractive index of MoS<sub>2</sub> layer is obtained by fitting. The dielectric function of MoS<sub>2</sub> can be expressed by the following equation.

$$\varepsilon_{MoS_2} = \varepsilon_r + i\varepsilon_i \quad (S11)$$

$\varepsilon_r$  and  $\varepsilon_i$  are respectively the real part and imaginary part of the dielectric function.

**Table S1.** Refractive Index of MoS<sub>2</sub>.

| wavelength | $\varepsilon_r$ | $\varepsilon_i$ | wavelength | $\varepsilon_r$ | $\varepsilon_i$ |
|------------|-----------------|-----------------|------------|-----------------|-----------------|
| 500.0814   | 24.63127        | 10.81341        | 610.5496   | 22.42838        | 14.30749        |
| 500.7591   | 24.56813        | 10.78345        | 611.2273   | 22.61936        | 14.51316        |
| 501.4368   | 24.50449        | 10.75379        | 611.905    | 22.802          | 14.70985        |
| 502.1145   | 24.44036        | 10.72441        | 612.5827   | 22.97537        | 14.89655        |
| 502.7923   | 24.37575        | 10.69532        | 613.2605   | 23.13851        | 15.07224        |
| 503.47     | 24.31068        | 10.66652        | 613.9382   | 23.29048        | 15.2359         |
| 504.1477   | 24.24517        | 10.63801        | 614.6159   | 23.43033        | 15.38651        |
| 504.8254   | 24.17922        | 10.60978        | 615.2936   | 23.55714        | 15.52307        |
| 505.5031   | 24.11287        | 10.58183        | 615.9713   | 23.66994        | 15.64455        |
| 506.1809   | 24.04611        | 10.55417        | 616.6491   | 23.76781        | 15.74994        |
| 506.8586   | 23.97896        | 10.52679        | 617.3268   | 23.84978        | 15.83823        |
| 507.5363   | 23.91145        | 10.49969        | 618.0045   | 23.91493        | 15.90839        |
| 508.214    | 23.84358        | 10.47287        | 618.6822   | 23.96231        | 15.95941        |
| 508.8917   | 23.77537        | 10.44633        | 619.3599   | 23.99097        | 15.99027        |
| 509.5694   | 23.70683        | 10.42007        | 620.0377   | 24              | 15.99998        |
| 510.2472   | 23.63798        | 10.39409        | 620.7154   | 23.99858        | 15.9929         |
| 510.9249   | 23.56883        | 10.36838        | 621.3931   | 23.99469        | 15.97344        |
| 511.6026   | 23.49941        | 10.34295        | 622.0708   | 23.98843        | 15.94215        |
| 512.2803   | 23.42971        | 10.3178         | 622.7485   | 23.97991        | 15.89956        |
| 512.958    | 23.35977        | 10.29291        | 623.4263   | 23.96924        | 15.84621        |
| 513.6358   | 23.28958        | 10.2683         | 624.104    | 23.95653        | 15.78263        |
| 514.3135   | 23.21918        | 10.24396        | 624.7817   | 23.94188        | 15.70937        |
| 514.9912   | 23.14856        | 10.21989        | 625.4594   | 23.92539        | 15.62697        |
| 515.6689   | 23.07776        | 10.19609        | 626.1371   | 23.90719        | 15.53595        |
| 516.3466   | 23.00678        | 10.17256        | 626.8148   | 23.88737        | 15.43686        |
| 517.0244   | 22.93563        | 10.1493         | 627.4926   | 23.86605        | 15.33024        |
| 517.7021   | 22.86434        | 10.1263         | 628.1703   | 23.84332        | 15.21661        |
| 518.3798   | 22.79291        | 10.10357        | 628.848    | 23.81931        | 15.09653        |
| 519.0575   | 22.72137        | 10.0811         | 629.5257   | 23.79411        | 14.97053        |
| 519.7352   | 22.64972        | 10.0589         | 630.2034   | 23.76783        | 14.83913        |
| 520.413    | 22.57798        | 10.03696        | 630.8812   | 23.74058        | 14.70289        |
| 521.0907   | 22.50617        | 10.01528        | 631.5589   | 23.71247        | 14.56234        |
| 521.7684   | 22.4343         | 9.99387         | 632.2366   | 23.6836         | 14.41802        |
| 522.4461   | 22.36239        | 9.97271         | 632.9143   | 23.65409        | 14.27046        |
| 523.1238   | 22.29045        | 9.95181         | 633.592    | 23.62404        | 14.12021        |
| 523.8015   | 22.21849        | 9.93117         | 634.2698   | 23.59356        | 13.96779        |

|                   |                                |                                |                   |                                |                                |
|-------------------|--------------------------------|--------------------------------|-------------------|--------------------------------|--------------------------------|
| 524.4793          | 22.14654                       | 9.91078                        | 634.9475          | 23.56275                       | 13.81375                       |
| 525.157           | 22.0746                        | 9.89065                        | 635.6252          | 23.53173                       | 13.65863                       |
| 525.8347          | 22.00269                       | 9.87078                        | 636.3029          | 23.50059                       | 13.50296                       |
| 526.5124          | 21.93082                       | 9.85116                        | 636.9806          | 23.46946                       | 13.34728                       |
| 527.1901          | 21.85902                       | 9.83179                        | 637.6584          | 23.43843                       | 13.19212                       |
| <b>wavelength</b> | <b><math>\epsilon_r</math></b> | <b><math>\epsilon_i</math></b> | <b>wavelength</b> | <b><math>\epsilon_r</math></b> | <b><math>\epsilon_i</math></b> |
| 527.8679          | 21.78729                       | 9.81268                        | 638.3361          | 23.40761                       | 13.03803                       |
| 528.5456          | 21.71565                       | 9.79381                        | 639.0138          | 23.37711                       | 12.88555                       |
| 529.2233          | 21.64412                       | 9.7752                         | 639.6915          | 23.34704                       | 12.7352                        |
| 529.901           | 21.5727                        | 9.75683                        | 640.3692          | 23.31751                       | 12.58753                       |
| 530.5787          | 21.50142                       | 9.73871                        | 641.0469          | 23.28862                       | 12.44308                       |
| 531.2565          | 21.43029                       | 9.72084                        | 641.7247          | 23.26048                       | 12.30237                       |
| 531.9342          | 21.35932                       | 9.70322                        | 642.4024          | 23.23319                       | 12.16596                       |
| 532.6119          | 21.28853                       | 9.68584                        | 643.0801          | 23.20688                       | 12.03437                       |
| 533.2896          | 21.21794                       | 9.6687                         | 643.7578          | 23.18163                       | 11.90815                       |
| 533.9673          | 21.14755                       | 9.65181                        | 644.4355          | 23.15757                       | 11.78784                       |
| 534.6451          | 21.07739                       | 9.63516                        | 645.1133          | 23.13479                       | 11.67396                       |
| 535.3228          | 21.00746                       | 9.61875                        | 645.791           | 23.11341                       | 11.56706                       |
| 536.0005          | 20.93779                       | 9.60258                        | 646.4687          | 23.09353                       | 11.46767                       |
| 536.6782          | 20.86839                       | 9.58665                        | 647.1464          | 23.07527                       | 11.37634                       |
| 537.3559          | 20.79927                       | 9.57096                        | 647.8241          | 23.05872                       | 11.29359                       |
| 538.0336          | 20.73045                       | 9.5555                         | 648.5019          | 23.044                         | 11.21998                       |
| 538.7114          | 20.66194                       | 9.54028                        | 649.1796          | 23.03121                       | 11.15603                       |
| 539.3891          | 20.59375                       | 9.5253                         | 649.8573          | 23.02046                       | 11.10228                       |
| 540.0668          | 20.52591                       | 9.51055                        | 650.535           | 23.01185                       | 11.05927                       |
| 540.7445          | 20.45843                       | 9.49603                        | 651.2127          | 23.00551                       | 11.02754                       |
| 541.4222          | 20.39132                       | 9.48175                        | 651.8905          | 23.00152                       | 11.00762                       |
| 542.1             | 20.32459                       | 9.4677                         | 652.5682          | 23.00001                       | 11.00006                       |
| 542.7777          | 20.25827                       | 9.45387                        | 653.2459          | 23.01454                       | 11.01066                       |
| 543.4554          | 20.19237                       | 9.44028                        | 653.9236          | 23.06283                       | 11.04593                       |
| 544.1331          | 20.12689                       | 9.42691                        | 654.6013          | 23.14256                       | 11.10388                       |
| 544.8108          | 20.06187                       | 9.41378                        | 655.279           | 23.25128                       | 11.18247                       |
| 545.4886          | 19.9973                        | 9.40087                        | 655.9568          | 23.38651                       | 11.27965                       |
| 546.1663          | 19.93321                       | 9.38818                        | 656.6345          | 23.54579                       | 11.39339                       |
| 546.844           | 19.86961                       | 9.37572                        | 657.3122          | 23.72665                       | 11.52163                       |
| 547.5217          | 19.80651                       | 9.36348                        | 657.9899          | 23.92664                       | 11.66235                       |
| 548.1994          | 19.74394                       | 9.35146                        | 658.6676          | 24.14328                       | 11.8135                        |
| 548.8772          | 19.6819                        | 9.33967                        | 659.3454          | 24.37412                       | 11.97303                       |
| 549.5549          | 19.62042                       | 9.3281                         | 660.0231          | 24.61669                       | 12.13891                       |
| 550.2326          | 19.55949                       | 9.31674                        | 660.7008          | 24.86852                       | 12.30909                       |
| 550.9103          | 19.49915                       | 9.30561                        | 661.3785          | 25.12716                       | 12.48153                       |
| 551.588           | 19.4394                        | 9.29469                        | 662.0562          | 25.39013                       | 12.65419                       |
| 552.2657          | 19.38026                       | 9.28399                        | 662.734           | 25.65497                       | 12.82502                       |
| 552.9435          | 19.32175                       | 9.2735                         | 663.4117          | 25.91922                       | 12.99199                       |
| 553.6212          | 19.26388                       | 9.26323                        | 664.0894          | 26.18042                       | 13.15305                       |
| 554.2989          | 19.20666                       | 9.25317                        | 664.7671          | 26.43609                       | 13.30616                       |
| 554.9766          | 19.15011                       | 9.24333                        | 665.4448          | 26.68379                       | 13.44928                       |
| <b>wavelength</b> | <b><math>\epsilon_r</math></b> | <b><math>\epsilon_i</math></b> | <b>wavelength</b> | <b><math>\epsilon_r</math></b> | <b><math>\epsilon_i</math></b> |
| 555.6543          | 19.09424                       | 9.23369                        | 666.1226          | 26.92103                       | 13.58036                       |
| 556.3321          | 19.03908                       | 9.22427                        | 666.8003          | 27.14536                       | 13.69737                       |
| 557.0098          | 18.98462                       | 9.21505                        | 667.478           | 27.35431                       | 13.79826                       |
| 557.6875          | 18.9309                        | 9.20605                        | 668.1557          | 27.54542                       | 13.88099                       |
| 558.3652          | 18.87792                       | 9.19725                        | 668.8334          | 27.71623                       | 13.94352                       |
| 559.0429          | 18.82569                       | 9.18866                        | 669.5111          | 27.86426                       | 13.98381                       |
| 559.7207          | 18.77424                       | 9.18028                        | 670.1889          | 27.98706                       | 13.99981                       |
| 560.3984          | 18.72358                       | 9.1721                         | 670.8666          | 28.09343                       | 13.99124                       |
| 561.0761          | 18.67372                       | 9.16412                        | 671.5443          | 28.19977                       | 13.9608                        |
| 561.7538          | 18.62468                       | 9.15635                        | 672.222           | 28.30599                       | 13.90988                       |
| 562.4315          | 18.57647                       | 9.14878                        | 672.8997          | 28.41176                       | 13.83983                       |

|                   |                                |                                |                   |                                |                                |
|-------------------|--------------------------------|--------------------------------|-------------------|--------------------------------|--------------------------------|
| 563.1093          | 18.52911                       | 9.14141                        | 673.5775          | 28.51678                       | 13.75201                       |
| 563.787           | 18.48261                       | 9.13424                        | 674.2552          | 28.62072                       | 13.64779                       |
| 564.4647          | 18.43699                       | 9.12727                        | 674.9329          | 28.72328                       | 13.52851                       |
| 565.1424          | 18.39226                       | 9.12049                        | 675.6106          | 28.82413                       | 13.39555                       |
| 565.8201          | 18.34844                       | 9.11391                        | 676.2883          | 28.92297                       | 13.25024                       |
| 566.4978          | 18.30553                       | 9.10753                        | 676.9661          | 29.01948                       | 13.09397                       |
| 567.1756          | 18.26357                       | 9.10135                        | 677.6438          | 29.11334                       | 12.92807                       |
| 567.8533          | 18.22256                       | 9.09536                        | 678.3215          | 29.20425                       | 12.75391                       |
| 568.531           | 18.18251                       | 9.08956                        | 678.9992          | 29.29187                       | 12.57285                       |
| 569.2087          | 18.14344                       | 9.08395                        | 679.6769          | 29.37591                       | 12.38624                       |
| 569.8864          | 18.10537                       | 9.07853                        | 680.3547          | 29.45605                       | 12.19545                       |
| 570.5642          | 18.06831                       | 9.07331                        | 681.0324          | 29.53196                       | 12.00183                       |
| 571.2419          | 18.03228                       | 9.06827                        | 681.7101          | 29.60334                       | 11.80674                       |
| 571.9196          | 17.99729                       | 9.06342                        | 682.3878          | 29.66987                       | 11.61154                       |
| 572.5973          | 17.96335                       | 9.05876                        | 683.0655          | 29.73124                       | 11.41758                       |
| 573.275           | 17.93049                       | 9.05428                        | 683.7432          | 29.78713                       | 11.22623                       |
| 573.9528          | 17.8987                        | 9.04999                        | 684.421           | 29.83724                       | 11.03884                       |
| 574.6305          | 17.86802                       | 9.04589                        | 685.0987          | 29.88123                       | 10.85678                       |
| 575.3082          | 17.83846                       | 9.04196                        | 685.7764          | 29.9188                        | 10.68139                       |
| 575.9859          | 17.81002                       | 9.03822                        | 686.4541          | 29.94963                       | 10.51404                       |
| 576.6636          | 17.78272                       | 9.03466                        | 687.1318          | 29.97342                       | 10.35608                       |
| 577.3414          | 17.75659                       | 9.03128                        | 687.8096          | 29.98984                       | 10.20888                       |
| 578.0191          | 17.73163                       | 9.02808                        | 688.4873          | 29.99857                       | 10.07379                       |
| 578.6968          | 17.70786                       | 9.02506                        | 689.165           | 29.99993                       | 9.95098                        |
| 579.3745          | 17.6853                        | 9.02222                        | 689.8427          | 29.99919                       | 9.83082                        |
| 580.0522          | 17.66395                       | 9.01955                        | 690.5204          | 29.99762                       | 9.71089                        |
| 580.7299          | 17.64384                       | 9.01706                        | 691.1982          | 29.99517                       | 9.59121                        |
| 581.4077          | 17.62497                       | 9.01474                        | 691.8759          | 29.99184                       | 9.47177                        |
| 582.0854          | 17.60737                       | 9.01259                        | 692.5536          | 29.98758                       | 9.3526                         |
| 582.7631          | 17.59105                       | 9.01062                        | 693.2313          | 29.98237                       | 9.2337                         |
| <b>wavelength</b> | <b><math>\epsilon_r</math></b> | <b><math>\epsilon_i</math></b> | <b>wavelength</b> | <b><math>\epsilon_r</math></b> | <b><math>\epsilon_i</math></b> |
| 583.4408          | 17.57602                       | 9.00882                        | 693.909           | 29.97619                       | 9.11509                        |
| 584.1185          | 17.56229                       | 9.00719                        | 694.5868          | 29.969                         | 8.99676                        |
| 584.7963          | 17.54989                       | 9.00572                        | 695.2645          | 29.96079                       | 8.87873                        |
| 585.474           | 17.53883                       | 9.00443                        | 695.9422          | 29.95152                       | 8.76102                        |
| 586.1517          | 17.52913                       | 9.0033                         | 696.6199          | 29.94117                       | 8.64363                        |
| 586.8294          | 17.52078                       | 9.00235                        | 697.2976          | 29.9297                        | 8.52656                        |
| 587.5071          | 17.51382                       | 9.00155                        | 697.9753          | 29.9171                        | 8.40984                        |
| 588.1849          | 17.50826                       | 9.00092                        | 698.6531          | 29.90333                       | 8.29347                        |
| 588.8626          | 17.50411                       | 9.00046                        | 699.3308          | 29.88836                       | 8.17745                        |
| 589.5403          | 17.50139                       | 9.00015                        | 700.0085          | 29.87218                       | 8.06181                        |
| 590.218           | 17.50011                       | 9.00001                        | 700.6862          | 29.85475                       | 7.94655                        |
| 590.8957          | 17.5039                        | 9.0042                         | 701.3639          | 29.83604                       | 7.83167                        |
| 591.5735          | 17.52627                       | 9.02829                        | 702.0417          | 29.81603                       | 7.7172                         |
| 592.2512          | 17.56766                       | 9.07286                        | 702.7194          | 29.7947                        | 7.60313                        |
| 592.9289          | 17.62713                       | 9.1369                         | 703.3971          | 29.77201                       | 7.48948                        |
| 593.6066          | 17.70373                       | 9.2194                         | 704.0748          | 29.74793                       | 7.37627                        |
| 594.2843          | 17.79653                       | 9.31934                        | 704.7525          | 29.72244                       | 7.26348                        |
| 594.9621          | 17.90457                       | 9.4357                         | 705.4303          | 29.69552                       | 7.15115                        |
| 595.6398          | 18.02693                       | 9.56746                        | 706.108           | 29.66712                       | 7.03928                        |
| 596.3175          | 18.16264                       | 9.71361                        | 706.7857          | 29.63724                       | 6.92787                        |
| 596.9952          | 18.31077                       | 9.87314                        | 707.4634          | 29.60584                       | 6.81694                        |
| 597.6729          | 18.47038                       | 10.04502                       | 708.1411          | 29.57288                       | 6.7065                         |
| 598.3506          | 18.64052                       | 10.22825                       | 708.8189          | 29.53836                       | 6.59655                        |
| 599.0284          | 18.82025                       | 10.4218                        | 709.4966          | 29.50223                       | 6.48711                        |
| 599.7061          | 19.00862                       | 10.62467                       | 710.1743          | 29.46448                       | 6.37819                        |
| 600.3838          | 19.20469                       | 10.83582                       | 710.852           | 29.42507                       | 6.2698                         |
| 601.0615          | 19.40752                       | 11.05425                       | 711.5297          | 29.38397                       | 6.16194                        |
| 601.7392          | 19.61617                       | 11.27895                       | 712.2075          | 29.34117                       | 6.05463                        |

|          |          |          |          |          |         |
|----------|----------|----------|----------|----------|---------|
| 602.417  | 19.82968 | 11.50889 | 712.8852 | 29.29662 | 5.94787 |
| 603.0947 | 20.04713 | 11.74306 | 713.5629 | 29.25032 | 5.84168 |
| 603.7724 | 20.26755 | 11.98044 | 714.2406 | 29.20222 | 5.73606 |
| 604.4501 | 20.49002 | 12.22002 | 714.9183 | 29.1523  | 5.63103 |
| 605.1278 | 20.71359 | 12.46079 | 715.596  | 29.10053 | 5.52659 |
| 605.8056 | 20.9373  | 12.70171 | 716.2738 | 29.04689 | 5.42276 |
| 606.4833 | 21.16023 | 12.94179 | 716.9515 | 28.99135 | 5.31955 |
| 607.161  | 21.38143 | 13.18    | 717.6292 | 28.93388 | 5.21696 |
| 607.8387 | 21.59995 | 13.41533 | 718.3069 | 28.87446 | 5.115   |
| 608.5164 | 21.81484 | 13.64675 | 718.9846 | 28.81305 | 5.01368 |
| 609.1942 | 22.02518 | 13.87327 | 719.6624 | 28.74963 | 4.91302 |
| 609.8719 | 22.23    | 14.09385 | 720.3401 | 28.68418 | 4.81303 |

## References

1. Schasfoort, R.B.M.; Tudos, A.J. *Handbook of Surface Plasmon Resonance*; The Royal Society of Chemistry: Cambridge, UK, **2008**; pp. 1–13.
2. Jackson, J. D.; *Classical Electrodynamics*, 3rd ed.; Wiley: New York, NY, USA, **1998**; pp. 1–135
3. Maier, S. A.; *Plasmonics: Fundamentals and Applications*. Springer: New York, NY, USA, **2007** pp. 49–74.
4. Liu, H.L.; Shen, C.C.; Su, S.H.; Hsu, C.L.; Li, M.Y.; Li, L.J. Optical properties of monolayer transition metal dichalcogenides probed by spectroscopic ellipsometry. *Appl. Phys. Lett.* **2014**, *105*, 201905.
